# Supplementary material
Source: publisher figshare collection journal article supplement (https://karger.figshare.com/ndownloader/files/16261211)
Supplement: Supplementary file 1 [file 16261211]

**Supplementary Information**

***A new generation somatostatin-dopamine analogue exerts potent antitumoral actions on pituitary neuroendocrine tumor cells***

Mari C. Vázquez-Borrego1,2,3,4, Fernando L-López1,2,3,4, María A. Gálvez-Moreno1,2,3,5, Antonio C. Fuentes-Fayos1,2,3,4, Eva Venegas-Moreno6, Aura D. Herrera-Martínez1,3,5, Cristóbal Blanco-Acevedo1,3,7, Juan Solivera1,3,7, Tanya Landsman8**, Manuel D. Gahete1,2,3,4, Alfonso Soto-Moreno6, Michael D. Culler8**, Justo P. Castaño1,2,3,4*, Raúl M. Luque1,2,3,4*.

1 Maimonides Institute of Biomedical Research of Cordoba (IMIBIC), 14004 Cordoba, Spain.

2 Department of Cell Biology, Physiology and Immunology, University of Cordoba, 14004 Cordoba, Spain.

3 Reina Sofia University Hospital (HURS), 14004 Cordoba, Spain.

4 CIBER Physiopathology of Obesity and Nutrition (CIBERobn), 14004 Cordoba, Spain.

5 Service of Endocrinology and Nutrition, IMIBIC, HURS, 14004 Cordoba, Spain.

6 Metabolism and Nutrition Unit, Hospital Universitario Virgen del Rocío, Instituto de Biomedicina de Sevilla (IBIS), 41013 Sevilla, Spain.

7 Service of Neurosurgery, HURS, 14004 Cordoba, Spain

8 IPSEN Bioscience, Cambridge, 02142 Massachusetts, USA.

**These authors have different current affiliations.

**Supplementary Figure 1:** ACTH-secreting adenomas. (A) Dose-response experiment of cell viability in response to BIM-065 (10-13 to 10-9 M; n=1), measured by Alamar-blue reduction. (B) Comparison of dose-response experiment between BIM-065 and octreotide on cell viability (10-11 to 10-7 M; n=1), measured by Alamar-blue reduction. Data are expressed as percent of vehicle-treated controls (set at 100%) within experiment. In cases where less than three experiment were carried out, no significance tests were performed.

**Supplementary Figure 2:** GH-secreting adenomas. Direct effect of BIM-065, octreotide and pasireotide on GH secretion (24h treatment; n=2), determined by commercial ELISA kit. Data are expressed as percent of vehicle-treated controls (set at 100%) within experiment. Values represent the mean ± SEM. In cases where less than three experiment were carried out, no significance tests were performed.

**Supplementary Figure 3:** Non-functioning pituitary adenomas. Dose-response experiment of cell viability in response to BIM-065 (10-9 to 10-6 M; n=3), measured by Alamar-blue reduction. Data are expressed as percent of vehicle-treated controls (set at 100%) within experiment. Values represent the mean ± SEM.

**Supplementary Figure 4:** PRL-secreting adenomas. (A) Expression profile of SST2, SST5, D2 (total and long isoforms), SST5TMD4 and SST5TMD5 of two different PRLomas. (B) Dose-response experiment of cell viability in response to BIM-065 (10-9 to 10-6 M; n=1), measured by Alamar-blue reduction. (C) Effect of BIM-065 and cabergoline on cell viability (10-7 M; 24 – 72h treatment) in two different PRLomas, measured by Alamar-blue reduction. (D) Measurement of PRL secretion (24h treatment) (n=1), determined by commercial ELISA kit. (E) mRNA expression levels of key genes in response to BIM-065 were measured by qPCR and adjusted by normalization factor (NF) (n=1). (F) Representative profile of [Ca2+]i kinetics assay in response to BIM-065 (n=1). Data are expressed as percent of vehicle-treated controls (set at 100%) within experiment. Values represent the mean ± SEM. In cases where less than three experiment were carried out, no significance tests were performed.

**Supplementary Figure 5:** Expression profile of tumor markers (PTTG1, CDKN1B and CDK2) in response to BIM-065 in different PitNETs, measured by qPCR and adjusted by normalization factor (NF). (A) ACTH-secreting PitNETs (n=4); (B) GH-secreting PitNETs (n=3); (C) Non-functioning pituitary adenomas (n=3) (D) PRL-secreting PitNETs (n=1). Data are expressed as percent of vehicle-treated controls (set at 100%) within experiment. Values represent the mean ± SEM. Asterisks (* p<0.05) indicate statistically significant differences. In cases where less than three experiment were carried out, no significance tests were performed.
